# Supplementary material
Source: PubMed Central journal article supplement (PMC2990128)
Supplement: supp_tpc.110.074781_Supplemental_data.pdf [file supp_tpc.110.074781_Supplemental_data.pdf]

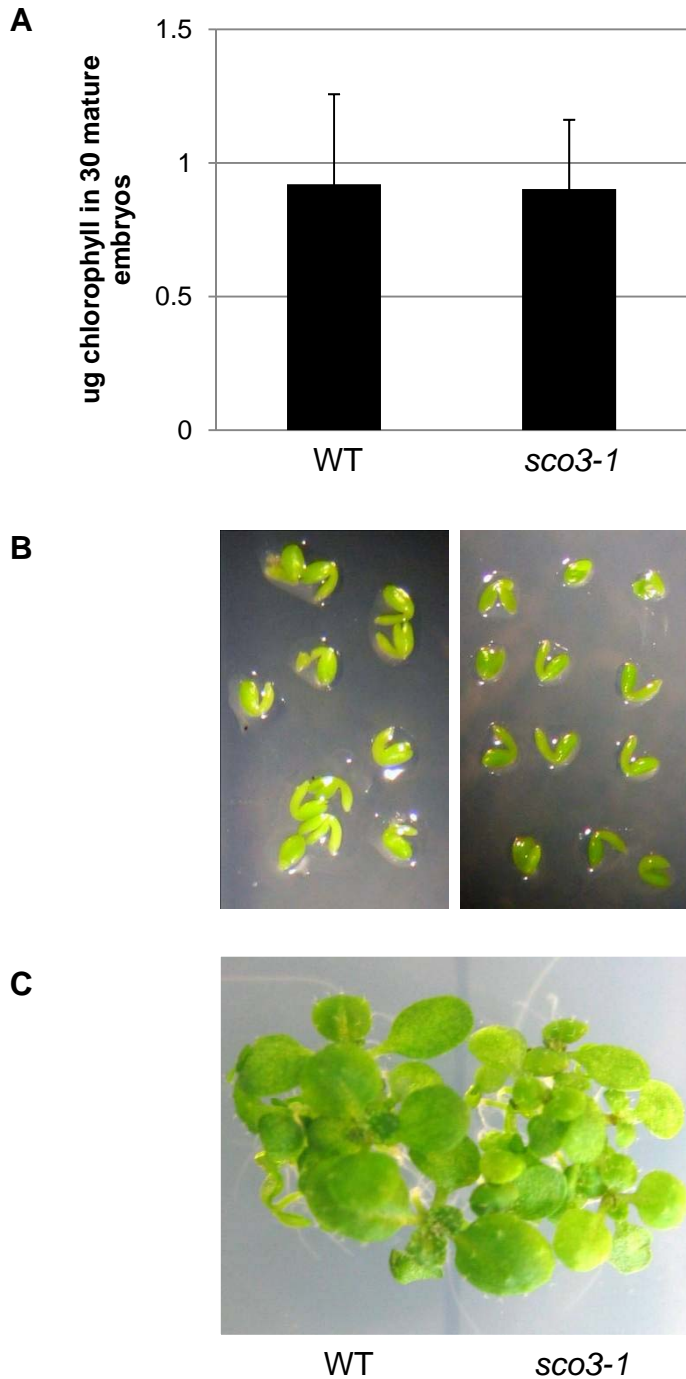

**Supplemental Figure 1:** Embryo development in the *sco3-1* mutant. (A) chlorophyll content in mature embryos of wildtype (WT) and *sco3-1* indicating the average and the standard deviation of three independent measurements. Phenotype of extracted mature embryos before (B) and after precocious germination (C).

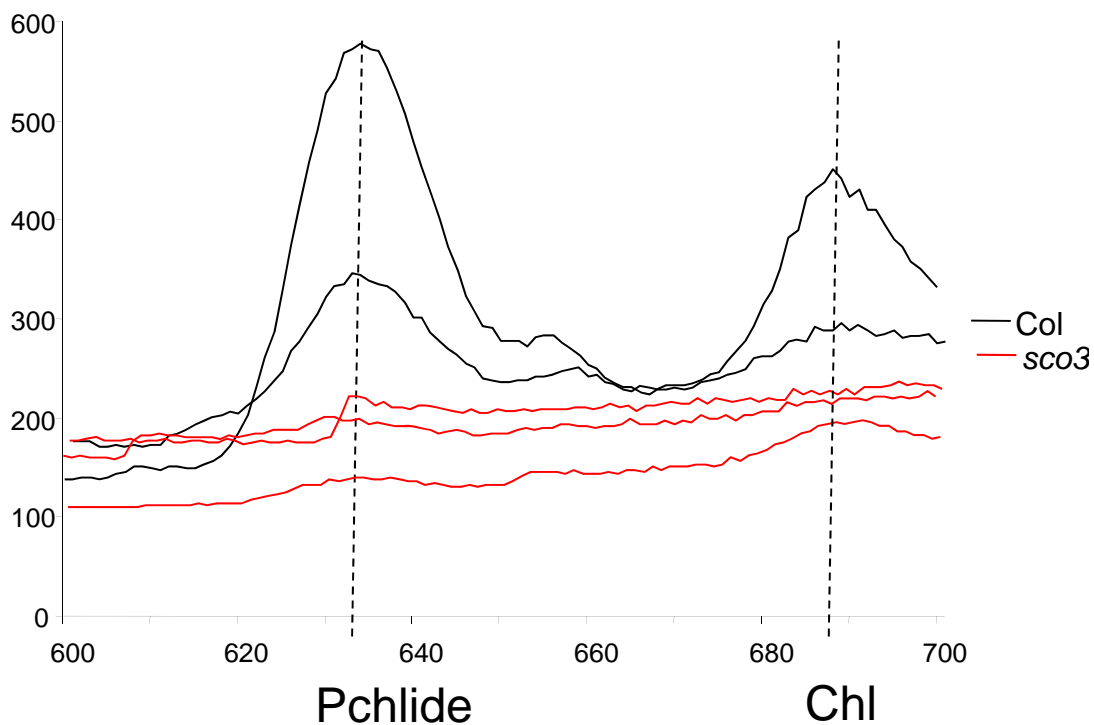

**Supplemental Figure 2:** Measurement of the protochlorophyllide (Pchl) autofluorescence of 4d old etiolated seedlings of *sco3-1* (red line) and Col (black line) using the 77K low temperature fluorescence. Trace levels of chlorophyll (Chl) indicate brief exposure to light during the procedure. Note that for *sco3-1* no peak for the Pchl could be detected.

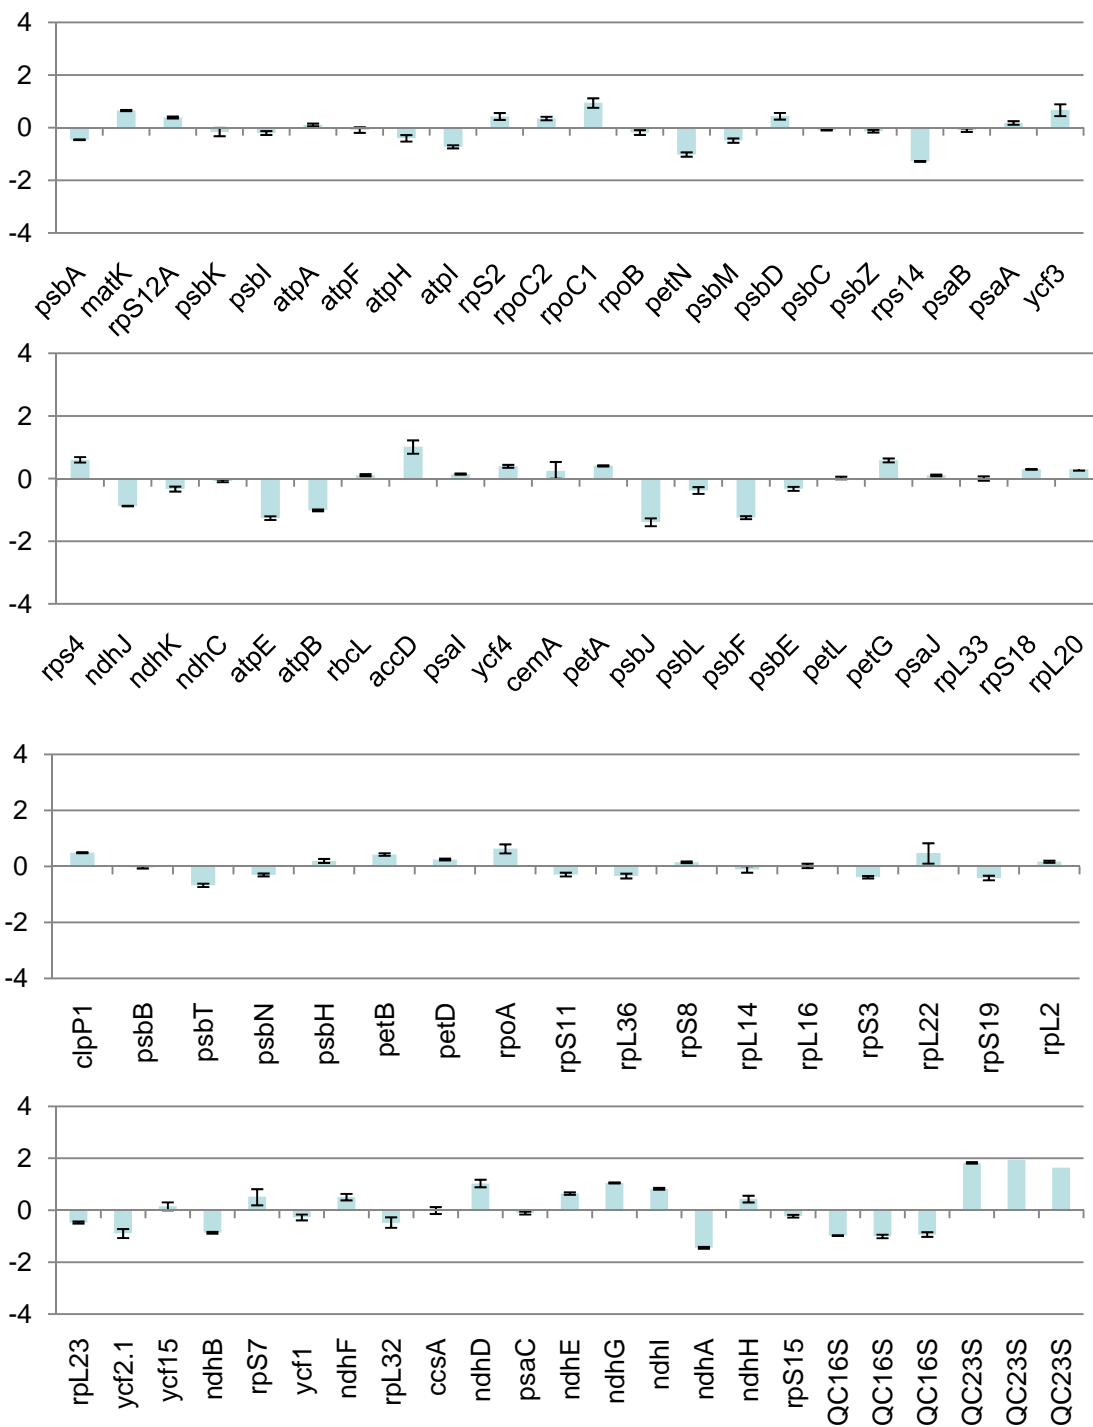

**Supplemental Figure 3:** Quantitative Real time analysis of transcript levels of chloroplast-encoded genes. Analyses have been performed on three independent replicates.

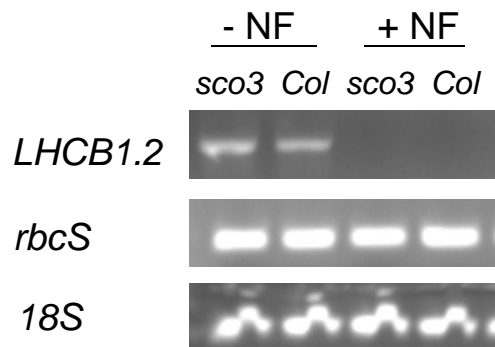

**Supplemental Figure 4:** RT-PCR analysis of transcript levels of retrograde signalling-controlled nuclear genes in *sco3-1* and *Col* on media either with or without the chloroplast biogenesis inhibitor Norflurazon (NF).

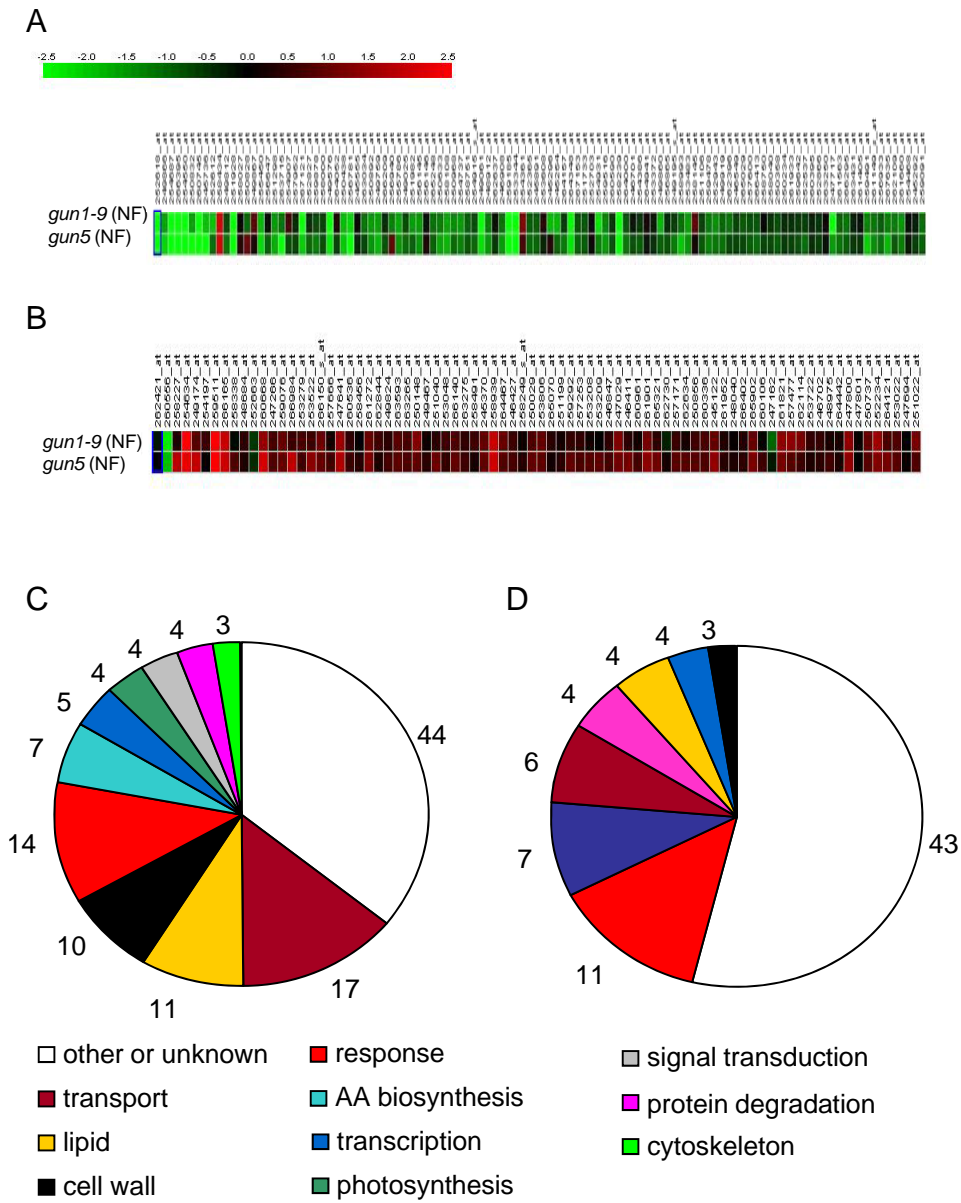

**Supplemental Figure 5.:** Microarray analysis. Heatmap of down- (A) and up-regulated genes (B) in *sco3-1* compared with their expression in Col, and the mutants *gun1-9*, and *gun5* treated with norflurazon. Summary of predicted function of (C) down-regulated and (D) up-regulated genes in *sco3-1*.

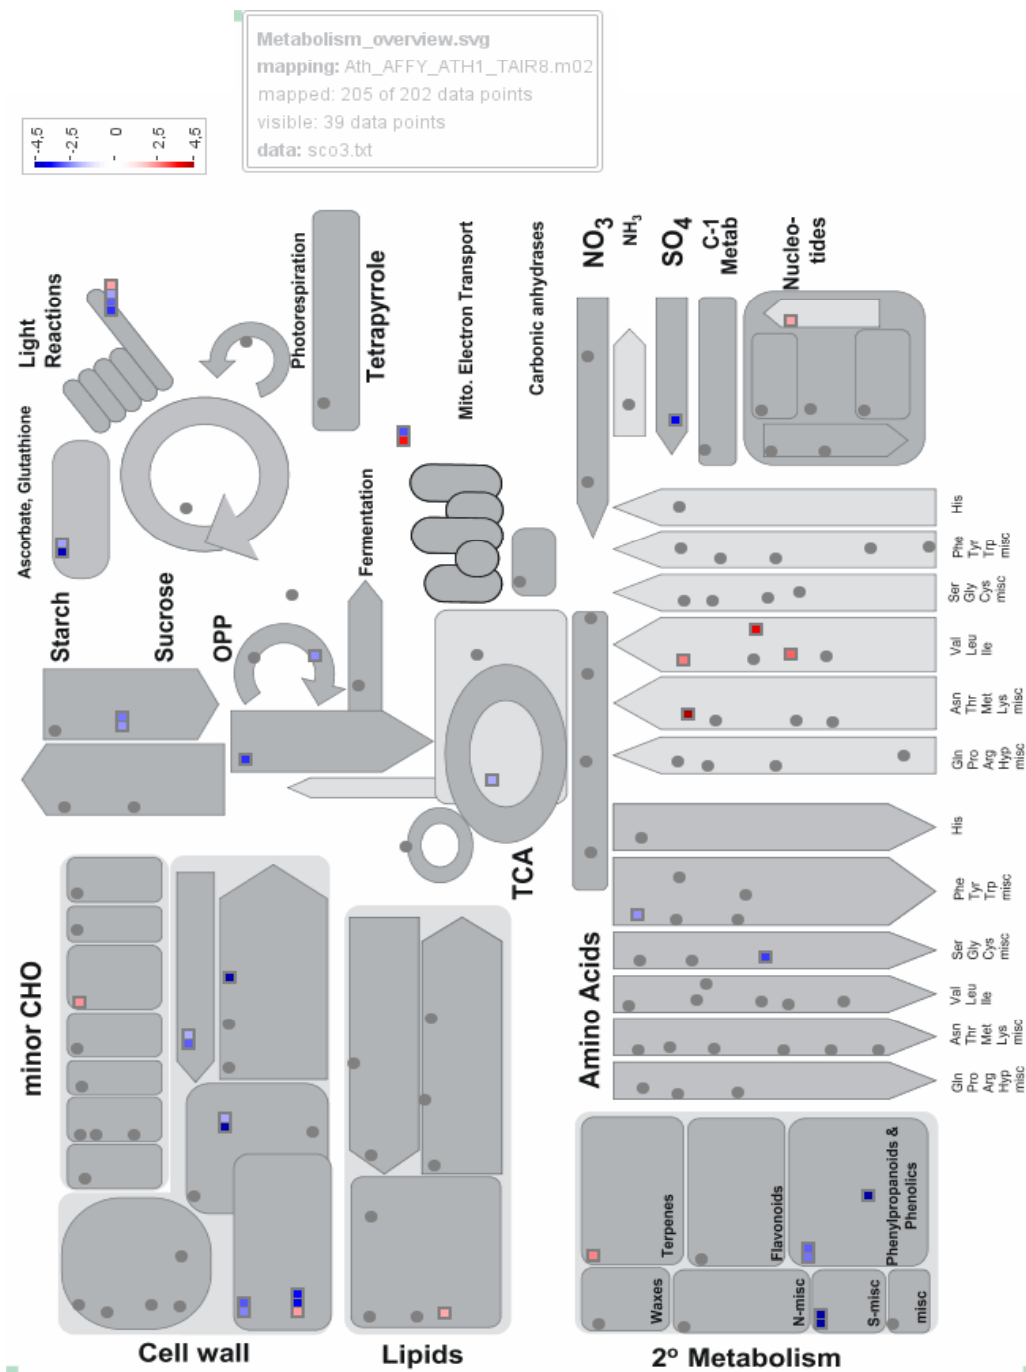

**Supplemental Figure 6:** Microarray analysis. MapMan analysis showing down- and up-regulated genes in *sco3-1*.

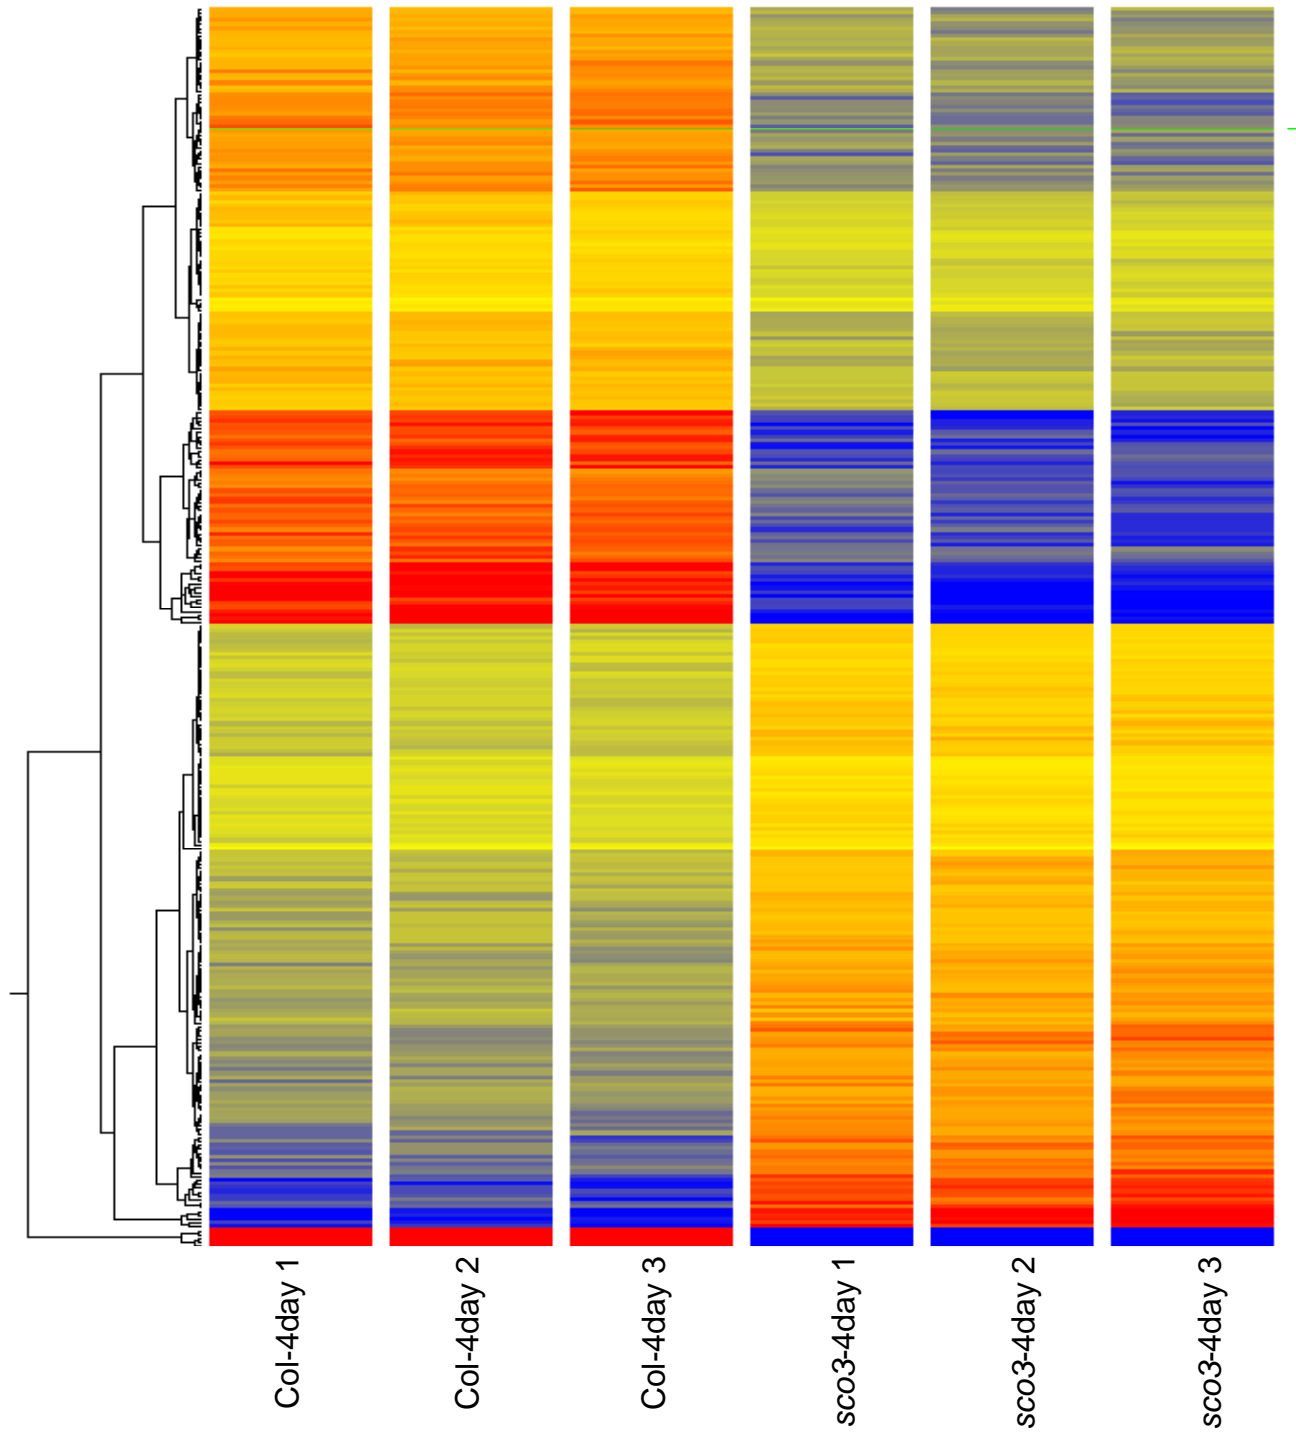

**Supplemental Figure 7:** Microarray analysis. Hierarchical graph of the expression data of differentially expressed genes in Col and *sco3-1*. Blue indicates no expression of the gene whereas red indicates high expression.

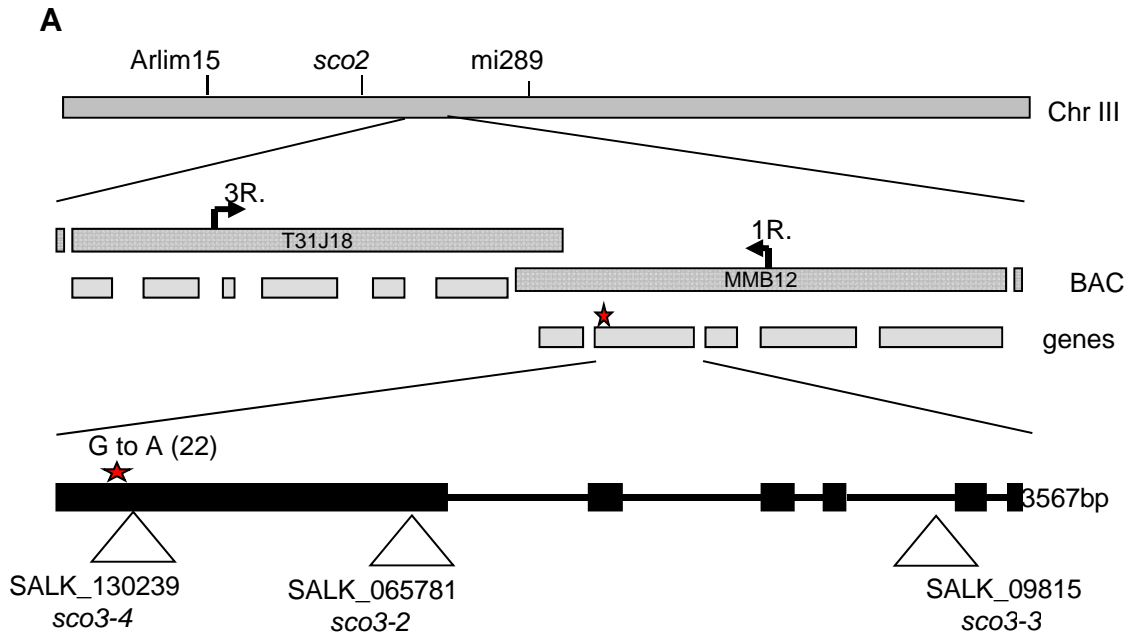

**Supplemental Figure 8:** The identification of the *SCO3* gene. (A) The mapping of *SCO3* on the upper arm of chromosome III and BAC clones covering this region with predicted genes. The gene mutated in *SCO3* is marked with an asterisk. The positions of both T-DNA insertion lines from SALK are indicated.



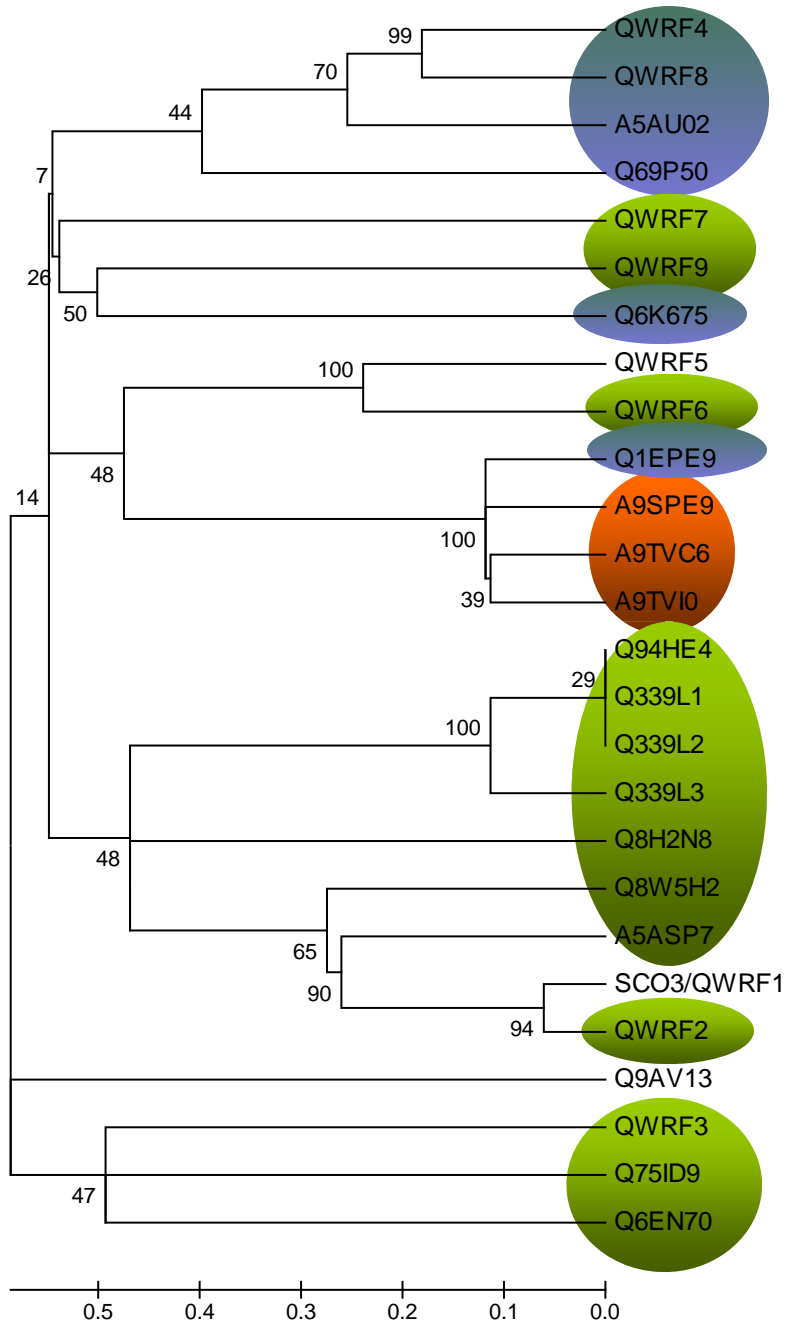

**Supplemental Figure 9:** Phylogenetic tree (Mega4.0.2, neighbour joining, bootstrap consensus tree) of the identified QWRF proteins in *Arabidopsis thaliana*, *Vitis vitifera*, *Oriza sativa*, *Musa accuminata* and *Physcomitrella patens*. Proteins predicted for chloroplast localization are shaded green, for unknown localization with blue and proteins identified in *Physcomitrella* are highlighted in red.

|            |                                                               |     |
|------------|---------------------------------------------------------------|-----|
| SCO3/QWRF1 | SAPARTSSSPSRVRNGVSEQMAYNR-TLPSILCFSADIRRGKIGEDRVMDAHLRLRLLYN  | 459 |
| QWRF2      | SSPARALSSPSRARNGVSDQMAYNRNNTPSILSFSADIRRGKIGEDRVMDAHLRLRLLYN  | 464 |
| QWRF3      | LVRSSTPPSRGRVSPSRIRQTAQS--SSTNTSVLSFIADVKKGKK-ATYIEDVHQLRLLYN | 394 |
| QWRF4      | -----KSSPFTSPLPKPKTCDTESAHQLKLMNN                             | 225 |
| QWRF5      | -----PVAPNSKIQADTKKQKALGQQADVHSLKLLHN                         | 279 |
| QWRF6      | -----PMAP--KVPADTKKQRKVTEQLEDVHSLKLLHN                        | 260 |
| QWRF7      | -----VLKYFMAQKKVSPVQEEEDYHRFRIFQN                             | 207 |
| QWRF8      | FARPSTPPSRGISPSRIRQTTTSTQSSSTTSVLSFITDVKKGKK-ASYIEDVHQLRLLYN  | 439 |
| QWRF9      | -----NVVKARVSQDRLEPSSHGLRKLISVDS                              | 250 |
| SCO3/QWRF1 | RDLOWRFANARADSTLMVQRLSAEKILWNAWVSISELRHVSITLKRILKLLMRQKLLASI  | 519 |
| QWRF2      | RDLOWRFVFNARADSTVMVQRLNAEKNLWNAWVSISELRHVSITLKRILKLLLRQKLLASI | 524 |
| QWRF3      | RLLOWRFVFNARACDVNKNVASQEKQQLCAWDTLIKLNLLVLEKRIKQKKNLEMKNLYV   | 285 |
| QWRF4      | RYSQWRFANARAEGVSYVQSLI-----                                   | 416 |
| QWRF5      | RYLOWRFANANAQVKTQSQAQAERMFYSLGLKMSSELSDSVQRKRIELQHLQRVKAVTEI  | 339 |
| QWRF6      | RYLOWRFANANAQVKTQTHKTQETMIHSPGSKISELHDSVQRKRIELQRLKTKALLAI    | 320 |
| QWRF7      | RLLOWRFVFNARTEATMANLKINVEDQLFWVWLRIYKMRNYVENLIEIQRQRQDIKQREV  | 267 |
| QWRF8      | RYLOWRFANARAESVMYIQRILTSEETLNFVWHAISELQDHVTRQRIQLQQLKLEIKLNSL | 499 |
| QWRF9      | VLSPEKNCQKQVSRFDLLHLVNLRLRYNAWRSISNLNYSVSMKRIEMQHLKQNLKLSI    | 310 |
| SCO3/QWRF1 | LKEQMCYLEEWSLLDRNHSNLSLGATEALKASTLRLPVSG-----KAVVDIQDLKHA     | 571 |
| QWRF2      | LRGQMGFLLEEWSLLDRDHSSLSLGATESLKASTLRLPIVG-----KTVVDIQDLKHA    | 576 |
| QWRF3      | FLSQVKHLEAWEDMEIQHLSLSIIRDSLHVSLSRPLKE-----GAKVNLESASVI       | 337 |
| QWRF4      | --AKMVCLDWMVEREHISLAGAIGDLEANTLRLPLAG-----GTKADLGSFLKA        | 466 |
| QWRF5      | VESQTPSLEQWAVLEDEFSTSLLETTEALLNASLRLPLDS-----KIKVETKELAEA     | 391 |
| QWRF6      | TESQTPCLEQWSAIEEYSTSVSQTIQAFSNASLRLPLDG-----DIMVDSKQLGDG      | 372 |
| QWRF7      | LSLQMPLLNEWSKIDAKNSEALSKLTRKHLASVRLPLVHGATKLIWKLQIDMVSIHEE    | 327 |
| QWRF8      | LNDQMVSLDQWATLERDHVSLVGAISDLEANTLRLPATG-----GTKADTESLKA       | 551 |
| QWRF9      | LNMQMGHLEEWLVIDRNYMGSIVGAAEALKGSTLCLPVD-----GAMVNVQSVKDA      | 362 |
| SCO3/QWRF1 | VSSAVDVMHAMVSSIFSLTS-----KVEEMNSVMAEMVNITGKEEVL               | 613 |
| QWRF2      | VSSAVDVMQAMSSSIFSLTS-----KVDEMNSVMVETVNVTAKEKVL               | 618 |
| QWRF3      | IKNAEAVTDALISTVDDYAP-----TMEGIVPLASQLAEVAVVQEKLM              | 379 |
| QWRF4      | MSSALDVMQSMGSSIWLSLHS-----QMEEMNKLVSDLAVIKTNFL                | 508 |
| QWRF5      | LVVASKSMEGIVQNIQNLV-----KTQEMETLMSELARVSGIEKAS                | 433 |
| QWRF6      | LVAASKIVDGTQNVENYMP-----KAKEMESLSELTRVARSERSL                 | 414 |
| QWRF7      | MVIAIEVMDEIEDVIKFLPRIHVKEINLRMSWVIKYQVEIILYELTELIGMFNQELLY    | 387 |
| QWRF8      | MSSALDVMQAMGSSIWLSLHS-----KVEEMNIMVTELAVVVTKESSM              | 593 |
| QWRF9      | ICSAVDVMQAMASSICLLLP-----KVGKISSLAELGRVNAKDEGM                | 404 |
| SCO3/QWRF1 | LEQCQGFLTRVAAMQVTDSCMKTHIQLSRL-----                           | 644 |
| QWRF2      | LERCQGLSRVAAMQVTDSCMKTHIQLSRIPITSSLTQP-----                   | 659 |
| QWRF3      | LEKCHDLLRMISELEDCVFPQSFATQFFKSKNYSILRLNKCCDSRKSLRFSVSDGTRW    | 438 |
| QWRF4      | LDKCNLLASTAVMEIEERSLKTHLIQKKQEEVRRDAESSP-LLPLSKFQWP-----      | 560 |
| QWRF5      | VEDCRVALLKTHSSQMECYLRSQLIQHKKCHQEQECTTSV-----                 | 474 |
| QWRF6      | TENCVVALKTQASQIEECSMRSQLIQQTTK--EESSK-----                    | 451 |
| QWRF7      | FEEMDESLLSIPLFTVIHYLLISLYICDRSGSFIYNLNGLFFIGSIWMWKLHRLKW---   | 443 |
| QWRF8      | QKCEDLLASTAIMQIEECSLRTHLIQTRREE--GEDAETPPPLPLSKFPWP-----      | 644 |
| QWRF9      | LDVCRDLLNTISALQVQYLKFIIDLSALYLQCWGLISKLCR-----                | 445 |

**Supplemental Figure 10:** ClustalW alignment of the QWRF domain of the different QWRF proteins in *Arabidopsis thaliana*. Amino acids conserved in eight of the nine proteins are highlighted in dark grey boxes. Light grey boxes indicate amino acids conserved in at least half of the QWRF proteins in *A. thaliana*.

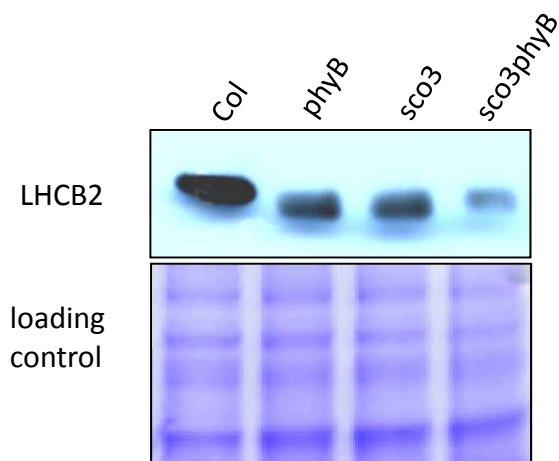

**Supplemental Figure 11:** Immunoblot analysis on total protein extract of 4days old seedlings of Col, *sco3-1*, *phyB* and *sco3-1phyB* using monoclonal LHCb2 antibody (Agrisera). NO size differences between Col and the mutants could be detected. A coomassie-stained loading control is shown on the bottom.

**Supplemental Table 1:** List of the identified QWRF proteins in different plant species, their accession number, size of the proteins and the predicted localization of the different QWRF proteins.

| name       | species               | gene/prot No | pred. localization | protein size |
|------------|-----------------------|--------------|--------------------|--------------|
| SCO3/QWRF1 | <i>A. thaliana</i>    | At3g19570    | unknown            | 644AA        |
| QWRF2      | <i>A. thaliana</i>    | At1g49890    | plastid            | 659AA        |
| QWRF3      | <i>A. thaliana</i>    | At2g20815    | plastid            | 438AA        |
| QWRF4      | <i>A. thaliana</i>    | At2g24070    | plastid            | 560AA        |
| QWRF5/EDE1 | <i>A. thaliana</i>    | At2g44190    | Nucl.microtubules  | 474AA        |
| QWRF6      | <i>A. thaliana</i>    | At3g60000    | plastid            | 451AA        |
| QWRF7      | <i>A. thaliana</i>    | At4g25190    | plastid            | 443AA        |
| QWRF8      | <i>A. thaliana</i>    | At4g30710    | unknown            | 644AA        |
| QWRF9      | <i>A. thaliana</i>    | At5g43160    | plastid            | 445AA        |
| A7NU78     | <i>Vitis vinifera</i> | A7NU78       | plastid            | 555AA        |
| A7QL53     | <i>Vitis vinifera</i> | A7QL53       | plastid            | 522AA        |
| A7PFN8     | <i>Vitis vinifera</i> | A7PFN8       | unknown            | 638AA        |
| A5AUO2     | <i>Vitis vinifera</i> | A5AUO2       | unknown            | 610AA        |
| H5ASP7     | <i>Vitis vinifera</i> | H5ASP7       | plastid            | 600AA        |
| A7QAR3     | <i>Vitis vinifera</i> | A7QAR3       | plastid            | 618AA        |
| Q6K675     | <i>Oryza sativa</i>   | Q6K675       | unknown            | 1369AA       |
| Q69P50     | <i>Oryza sativa</i>   | Q69P50       | unknown            | 579AA        |
| Q9AV13     | <i>Oryza sativa</i>   | Q9AV13       | mitochondria       | 369AA        |
| Q75ID9     | <i>Oryza sativa</i>   | Q75ID9       | plastid            | 529AA        |
| Q94HE4     | <i>Oryza sativa</i>   | Q94HE4       | plastid            | 461AA        |
| Q339L2     | <i>Oryza sativa</i>   | Q339L2       | plastid            | 431AA        |
| Q6EN70     | <i>Oryza sativa</i>   | Q6EN70       | plastid            | 497AA        |
| Q339L1     | <i>Oryza sativa</i>   | Q339L1       | plastid            | 322AA        |
| Q8H2N8     | <i>Oryza sativa</i>   | Q8H2N8       | plastid            | 520AA        |
| Q8W5H2     | <i>Oryza sativa</i>   | Q8W5H2       | plastid            | 653AA        |
| Q339L3     | <i>Oryza sativa</i>   | Q339L3       | plastid            | 462AA        |
| Q1EPE9     | <i>M. accuminata</i>  | Q1EPE9       | unknown            | 643AA        |
| A9SPE9     | <i>P.patens</i>       | A9SPE9       | unknown            | 859AA        |
| A9TVI0     | <i>P.patens</i>       | A9TVI0       | unknown            | 965AA        |
| A9U2E5     | <i>P.patens</i>       | A9U2E5       | unknown            | 784AA        |
| A9TVC6     | <i>P.patens</i>       | A9TVC6       | unknown            | 856AA        |

**SupplYa YbHJ Table 2: Primers used for the different analyses**

| Primer            | Used for                         | sequence                                  |
|-------------------|----------------------------------|-------------------------------------------|
| SCO3-pENTR-F      | Cloning                          | TTT TgtcgactATGGTGGCTGCGATTCT             |
| SCO3-pENTR-R      | Cloning                          | TTT gcgggccgc ttTAGCCGGCTAAGTTGTATTATGTGC |
| Sco3-sv1-RT-R:    | Cloning                          | GCAGTCCGTAACCTGCATTGCT                    |
| SCO3-sv2-RT-R     | Cloning                          | GCAAGAGGCATGTCTTGTAAAG                    |
| SCO3-F1           | Sequencing and genotyping        | cttcgctctg aagcaaaga                      |
| SCO3-R1           | Sequencing and genotyping        | Ctt ggg cta gaa cat tga ggt ga            |
| SCO3-F2           | Sequencing and genotyping        | CGTGTGACTT TACTGCATCT                     |
| SCO3-R2           | Sequencing and genotyping        | CTCATCAAGAGCAACTTGATCCG                   |
| SCO3-F3           | Sequencing and genotyping        | gcctgat gctgatgta tgaca                   |
| SCO3-R3           | Sequencing and genotyping/RT-PCR | Ggt tgtg aag tgg cgt gag t                |
| SCO3-RT-F         | RT-PCR                           | GCCGTGGTTGATATTCAAG                       |
| Sco3-Ncol-F       | Cloning                          | TTT TCC ATG GGG ATGGTGGCTGCGATTCT         |
| SCO3-oSRL-pENTR-R | Cloning                          | TTT Tgcgggccgc ttAAGTTGTATTATGTGCGTCTT    |
| SSU-Ncol-F        | Cloning                          | TTT TCC ATG GGG ATGGCTTCCTCTATGTCTCTC     |
| SSU-Sall-R        | Cloning                          | TTT Tgtcgac cttcttctccaatcggg             |
| psaA-F            | RT-PCR                           | GGTAGATAGGGATCCCGTAA                      |
| psaA-R            | RT-PCR                           | CATCTTGAAACCAAGCCAA                       |
| psbA-F            | RT-PCR                           | tgccattatctactctctgc                      |
| psbA-R            | RT-PCR                           | cgtagagcagctacaatggtg                     |
| clpP-F            | RT-PCR                           | CCA AGAGGTTGAT ACCGA                      |
| clpP-R            | RT-PCR                           | cga act agc qgg ttg a                     |
| 16S-F             | RT-PCR                           | TAAGCATCGGCTAACTCTGTGCC                   |
| 16S-R             | RT-PCR                           | TACAGCACTGCACGGGTCGATAC                   |
| 23S-F             | RT-PCR                           | TGTGGTTAGGGGTGAAATGCCAC                   |
| 23S-R             | RT-PCR                           | ATCGCTTAGCCCCGTTTCATCTTC                  |
| accD-F            | RT-PCR                           | CCAAGGACATTGCGAA                          |
| accD-R            | RT-PCR                           | ggatcatagtgcagatcgtt                      |
| rpoA-F            | RT-PCR                           | GGCCAAGCCGACACA                           |
| rpoA-R            | RT-PCR                           | ccgcgattcctca                             |
| rpoB-F            | RT-PCR                           | aCCAGTCAGAATTGGATCA                       |
| rpoB-R            | RT-PCR                           | ggatccccacctacaca                         |
| CAB3-F (LHCB1.2)  | RT-PCR                           | gtgtgacaatgaggaagact                      |
| CAB3-R (LHCB1.2)  | RT-PCR                           | CTTCAACGGCTCCCATCA                        |
| POR B-F           | RT-PCR                           | GATCCATTACCGGGAACA                        |
| POR B-R           | RT-PCR                           | Ggatcactcaccactgag                        |
| RBCS_F            | RT-PCR                           | GTTCTTCCCGTCAGAGTAAGT                     |
| RBCS_R            | RT-PCR                           | cttactcgcaacctcag                         |
| 18SrRNA-F         | RT-PCR                           | gaattcctagtaagcgcgagtcac                  |
| 18SrRNA-R         | RT-PCR                           | cacctacggaaacctgttacgactctt               |
| LHCB1.5-F         | RT-PCR                           | ttatggcttctcaacca                         |
| LHCB1.5-R         | RT-PCR                           | ctttccggggacga                            |
| LHCB2.4-F         | RT-PCR                           | atggccactcagcaat                          |
| LHCB2.4-R         | RT-PCR                           | ttttccggggacga                            |
